# Supplementary material for: Sensitive hydrazine detection and quantification with a fluorescent benzothiadiazole sensor: selective lipid droplets andin vivoimaging
Source: Royal Society of Chemistry journal article supplement (doi:10.1039/d3ob00007a), 2023-01-01
Supplement: d3ob00007a1.pdf [file d3ob00007a1.pdf]

*Supporting Information for*

**Sensitive Hydrazine Detection and Quantification with a Fluorescent Benzothiadiazole Sensor:  
Selective Lipid Droplets and In Vivo Imaging**

Camila O. Santos,<sup>a</sup> Saulo T. A. Passos,<sup>a</sup> Jenny E. P. Sorto,<sup>a</sup> Daniel F. S. Machado,<sup>a</sup> Jose R. Correia,<sup>a</sup>  
Eufrânio N. da Silva Júnior,<sup>b</sup> Marcelo O. Rodrigues,<sup>a</sup> and Brenno A. D. Neto,<sup>\*a</sup>

[brenno.ipi@gmail.com](mailto:brenno.ipi@gmail.com)

<sup>a</sup> Laboratory of Medicinal and Technological Chemistry, University of Brasília, Chemistry Institute (IQ-UnB), Campus Universitário Darcy Ribeiro, Brasília, Distrito Federal, 70904-900, Brazil.

<sup>b</sup> Institute of Exact Sciences, Department of Chemistry Federal University of Minas Gerais, Belo Horizonte, 31270-901, Brazil.

**Summary**

|            |         |            |          |
|------------|---------|------------|----------|
| Figure S1  | Page S2 | Figure S13 | Page S7  |
| Figure S2  | Page S2 | Figure S14 | Page S8  |
| Figure S3  | Page S2 | Figure S15 | Page S8  |
| Figure S4  | Page S3 | Figure S16 | Page S8  |
| Figure S5  | Page S3 | Figure S17 | Page S9  |
| Figure S6  | Page S4 | Figure S18 | Page S9  |
| Figure S7  | Page S4 | Figure S19 | Page S10 |
| Figure S8  | Page S5 | Figure S20 | Page S11 |
| Figure S9  | Page S5 | Figure S21 | Page S11 |
| Figure S10 | Page S6 | Figure S22 | Page S12 |
| Figure S11 | Page S6 | Figure S23 | Page S12 |
| Figure S12 | Page S7 |            |          |

Table S1 \_\_\_\_\_ Page S12

Table S2 \_\_\_\_\_ Page S13

Cartesian coordinates and energies of calculates structures \_\_\_\_\_ Pages S13-S15

References \_\_\_\_\_ Page S15

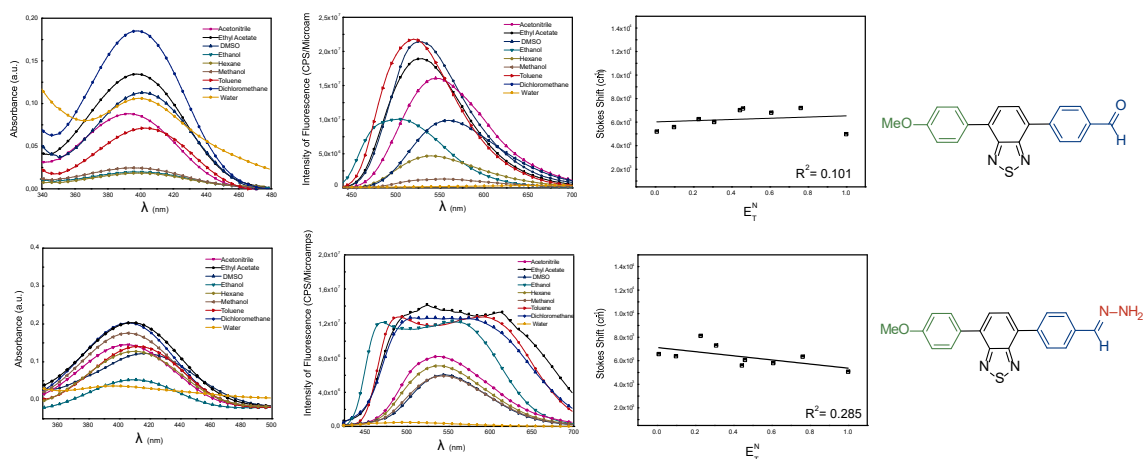

**Figure S1.** UV-Vis (left), fluorescence (center) and solvatochromic effect (Reichardt, right) of the synthesized BTDs (**BTD-CHO** and **BTD-HZN**). 10  $\mu$ M for all analyses.

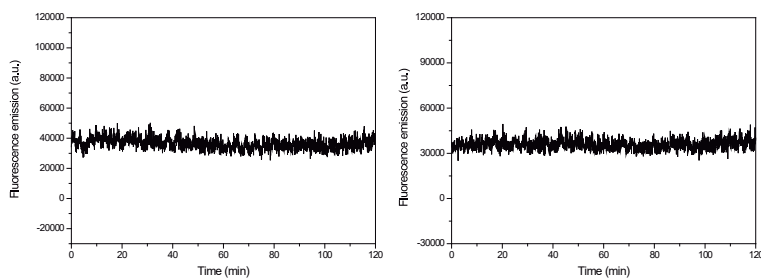

**Figure S2.** Photostability of the synthesized dyes (10  $\mu$ M) acquired at room temperature upon excitation at 254 nm while monitoring the emission at the emission maxima of each molecule in aqueous solutions. Time-dependence of photoluminescence intensity was carried out with a Xe lamp (400 W). (Right) **BTD-CHO** and (Left) **BTD-HZN**.

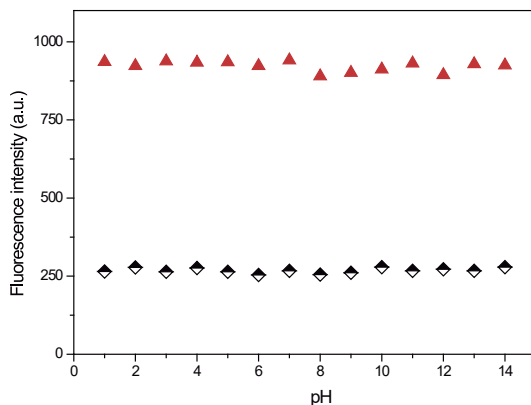

**Figure S3.** pH effect over the fluorescence emission of the dyes **BTD-CHO** (black) and **BTD-HZN** (red). Concentration: 10  $\mu$ M.

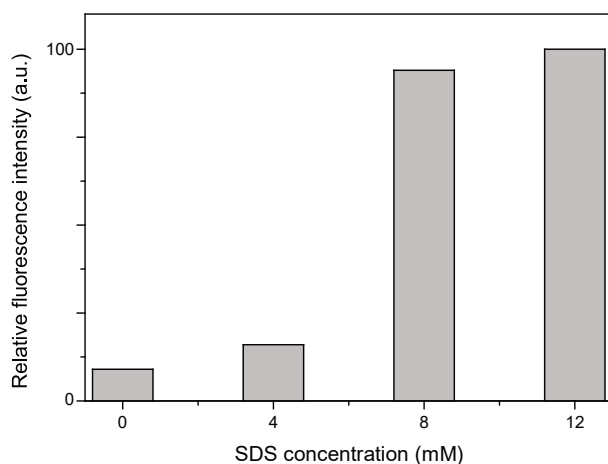

**Figure S4.** **BTD-CHO** (10  $\mu\text{M}$ ) before and after addition of SDS (CMC = 8 mM). The light-up in the emission intensity of the dye is 11-fold when compared with the emission in the absence of SDS.

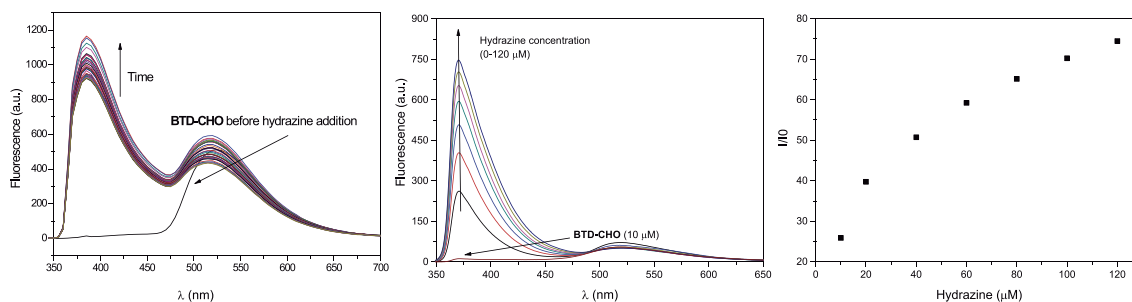

**Figure S5.** **BTD-CHO** (10  $\mu\text{M}$ ) in phosphate buffer solutions (pH = 7.0) before and after addition of hydrazine (0-120  $\mu\text{M}$ ). The reaction was fast, as expected, and in a few minutes, it was noted the dye total consume affording **BTD-HZN**. (Left) Hydrazine addition (10  $\mu\text{M}$ ) and fast **BTD-CHO** consumption monitoring for a period of ten minutes. (Center) Fluorescence increase after analyte (hydrazine) addition. (Right) Fluorescence intensity as a function of the analyte concentration. Excitation wavelength at 340 nm.



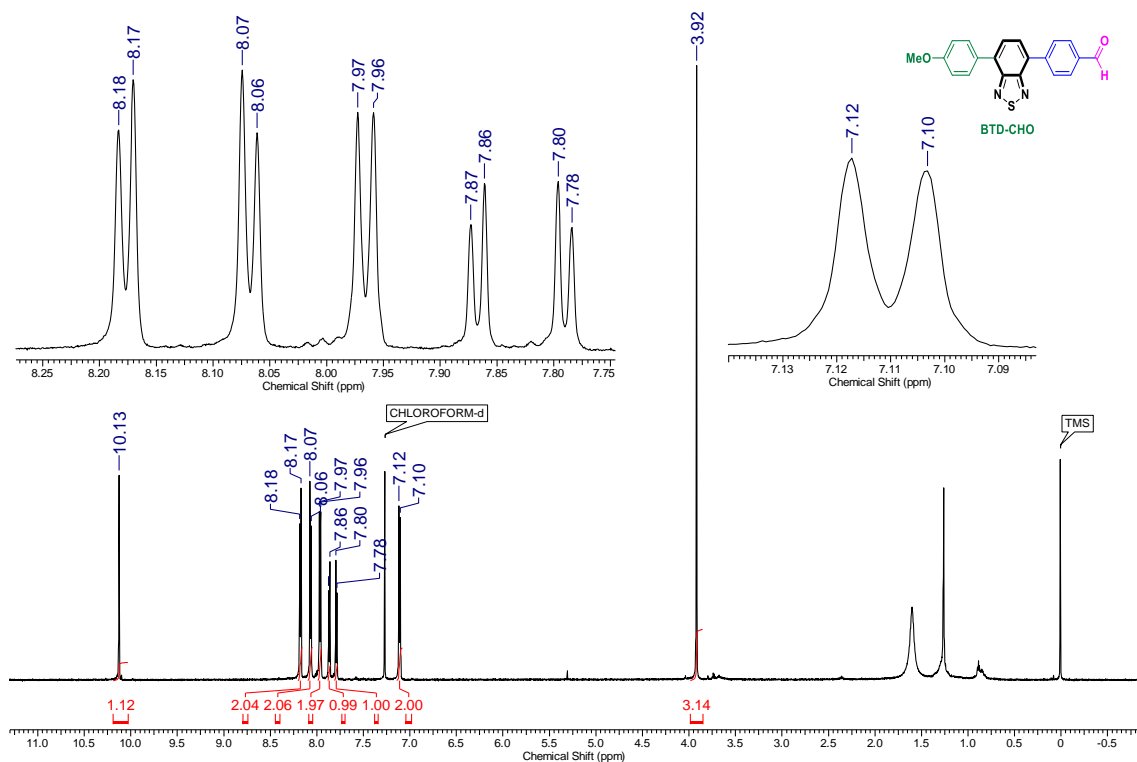

Figure S8.  $^1\text{H}$  NMR (600 MHz,  $\text{CDCl}_3$ ) of the sensor named BTD-CHO.

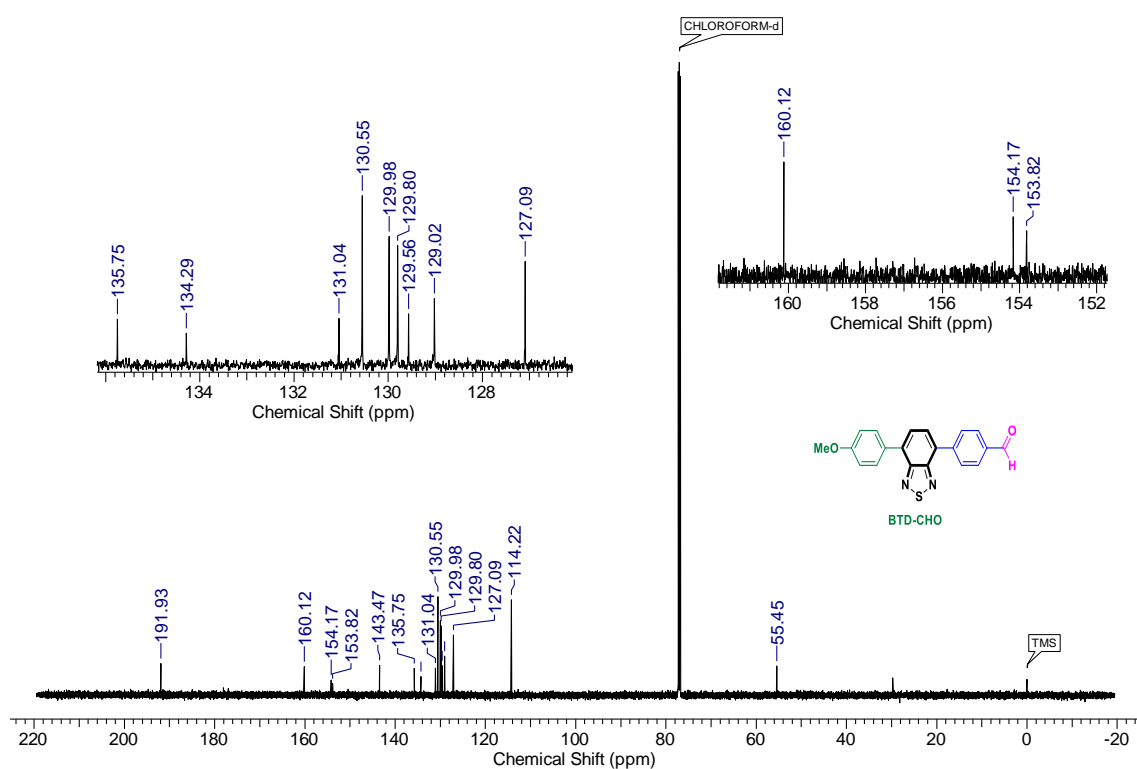

Figure S9.  $^{13}\text{C}$  NMR (150 MHz,  $\text{CDCl}_3$ ) of the sensor named BTD-CHO.

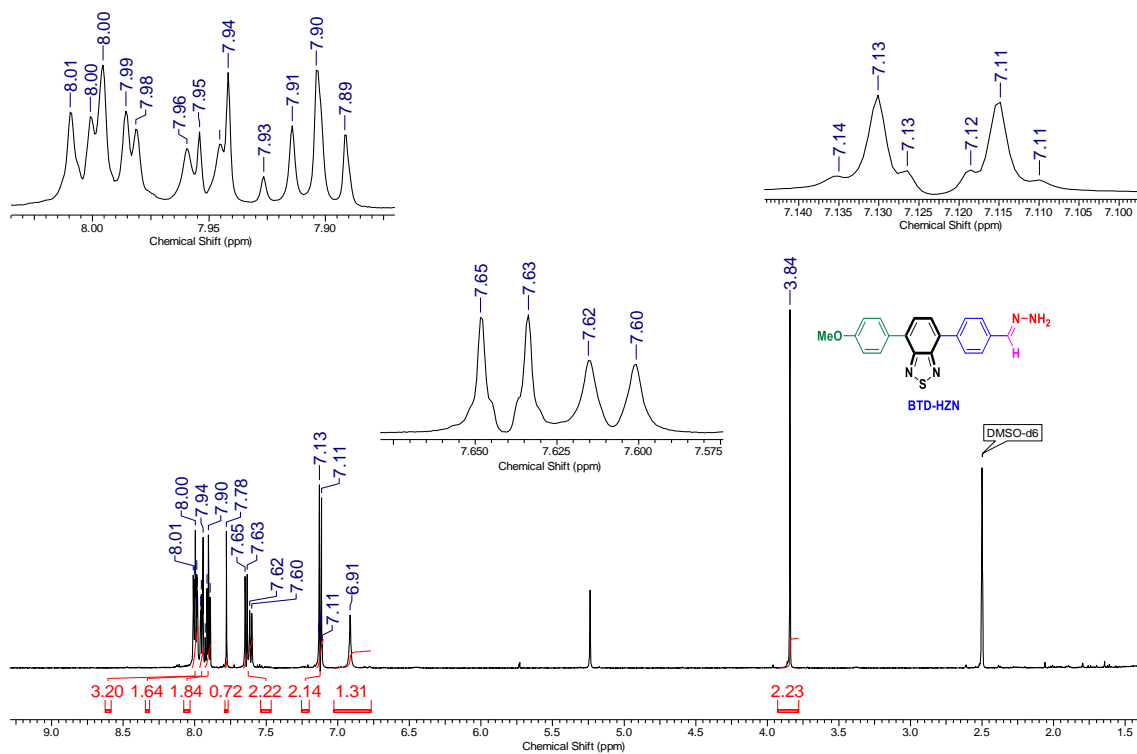

**Figure S10.** <sup>1</sup>H NMR (600 MHz, DMSO-*d*<sub>6</sub>) of the dye named BTD-HZN.

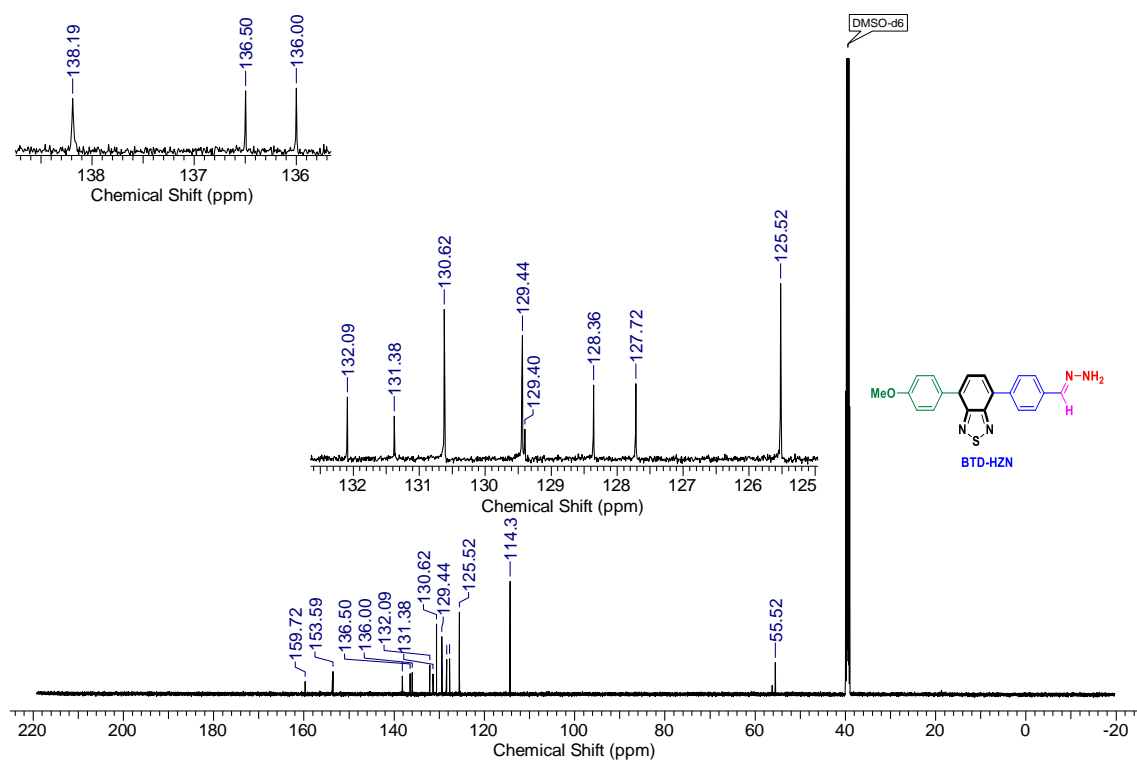

**Figure S11.** <sup>13</sup>C NMR (150 MHz, DMSO-*d*<sub>6</sub>) of the dye named BTD-HZN.

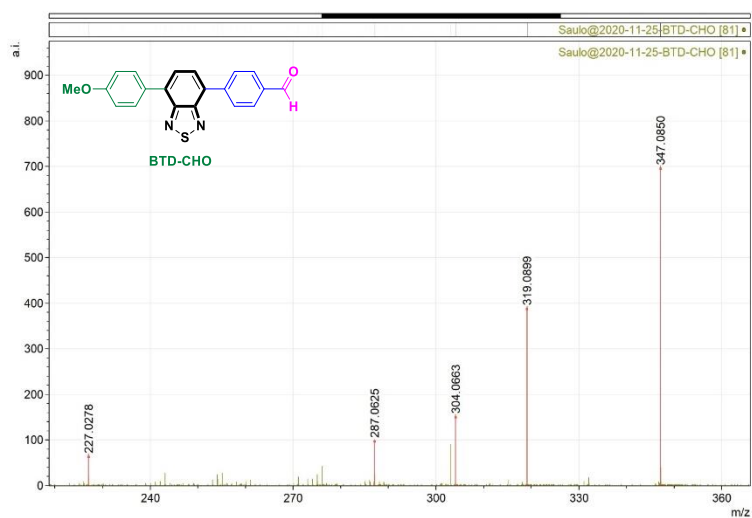

**Figure S12.** ESI(+)-MS/MS of the protonated **BTD-CHO** ( $m/z$  347). Calculated for  $[C_{20}H_{14}N_2O_2S+H]^+$ , 347.0854. Found, 347.0846. Error = -2.3 ppm.

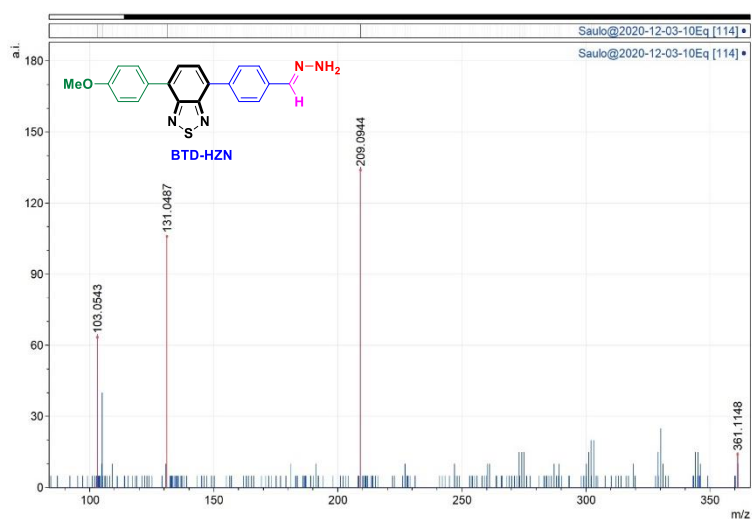

**Figure S13.** ESI(+)-MS/MS of the protonated **BTD-HZN** ( $m/z$  361). Calculated for  $[C_{20}H_{16}N_4OS+H]^+$ , 361.1123. Found, 361.1153. Error = 6.9 ppm.

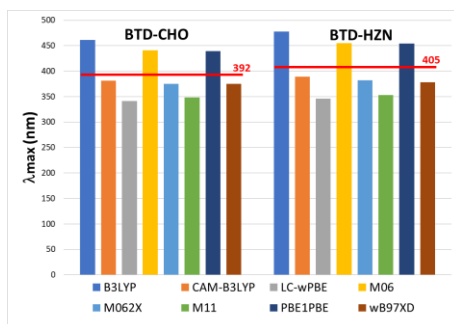

**Figure S14.** CAM-B3LYP/6-311+G(d,p) vertical absorption wavelengths of the BTD dyes in acetonitrile (IEF-PCM) associated with the lowest energy  $S_0 \rightarrow S_1$  electronic transitions. Horizontal red lines stand for the experimentally determined  $\lambda_{\max}$  in acetonitrile.

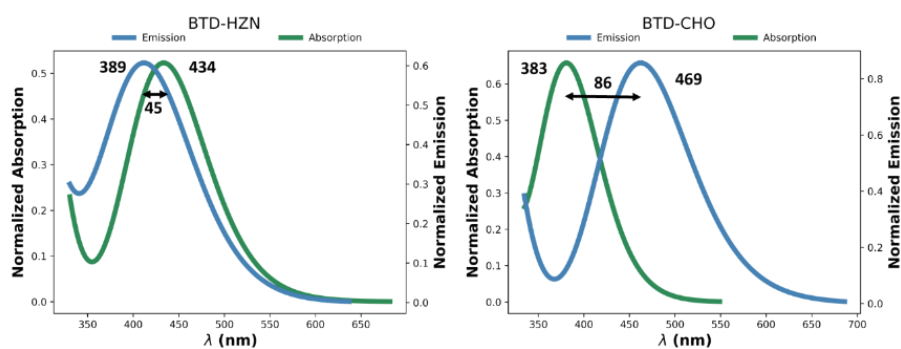

**Figure S15.** CAM-B3LYP/6-311+G(d,p) absorption and emission spectra of the BTD dyes in acetonitrile (IEF-PCM) associated with the lowest energy  $S_0 \rightarrow S_1$  electronic transitions.

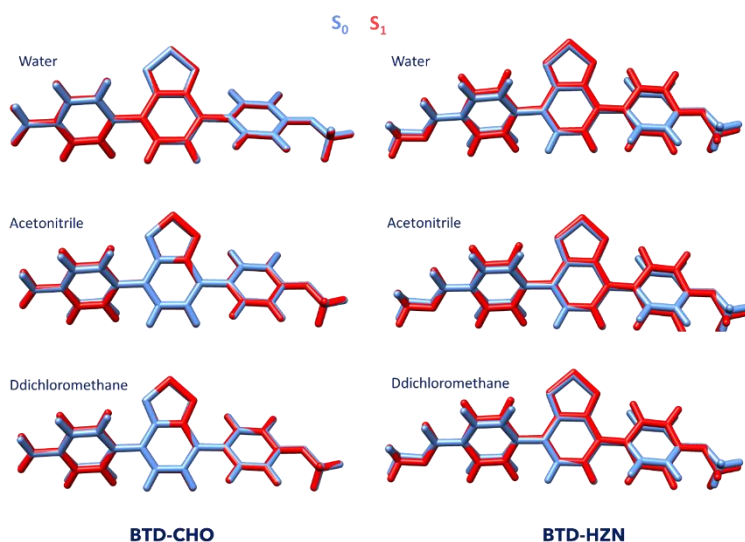

**Figure S16.** Overlay of the ground ( $S_0$ ) and first excited ( $S_1$ ) state geometries in different solvents for BTD-CHO and BTD-HZN.



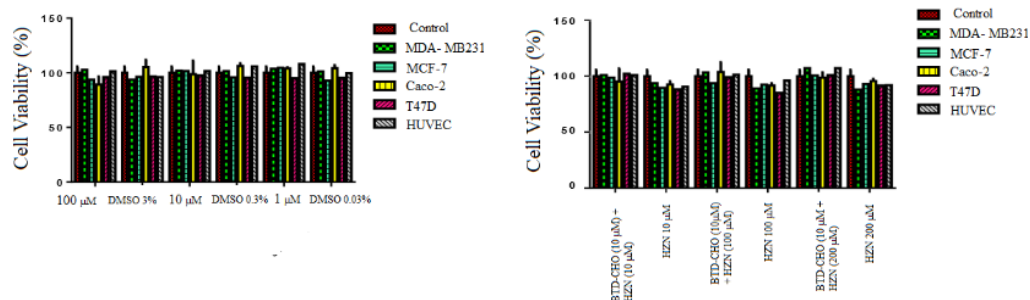

**Figure S17.** Cellular viability assays (MTT) after 24 h for the **BTD-CHO** (left) and *in situ* formed **BTD-HZN** (right). The graphic bar shows no statistically significant cytotoxic effect after 24 h of incubation for the tested compounds in solutions at different concentrations (1-100 μM).

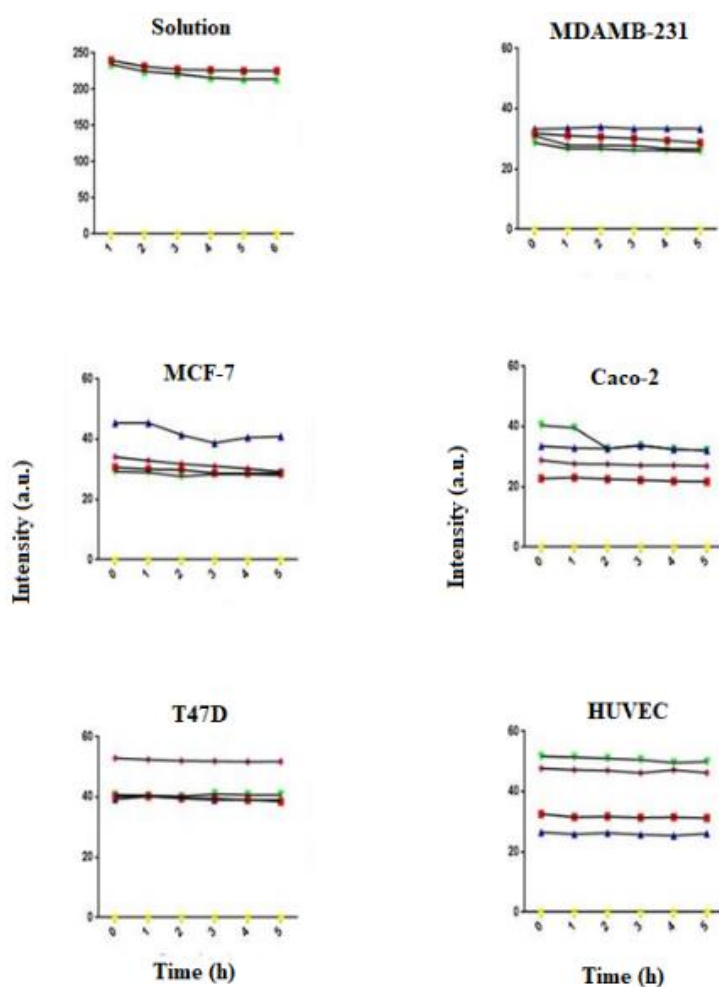

**Figure S18.** Fluorescence emissions (photostabilities) inside the different cells' lineages. Yellow is the PBS solution without no fluorescent dye, red and green (**BTD-CHO** and **BTD-HZN**, respectively) are referred to live cells (except for the solution measurement which is a dye-containing PBS solution), blue and purple (**BTD-CHO** and **BTD-HZN**, respectively) is referred to fixed cells.

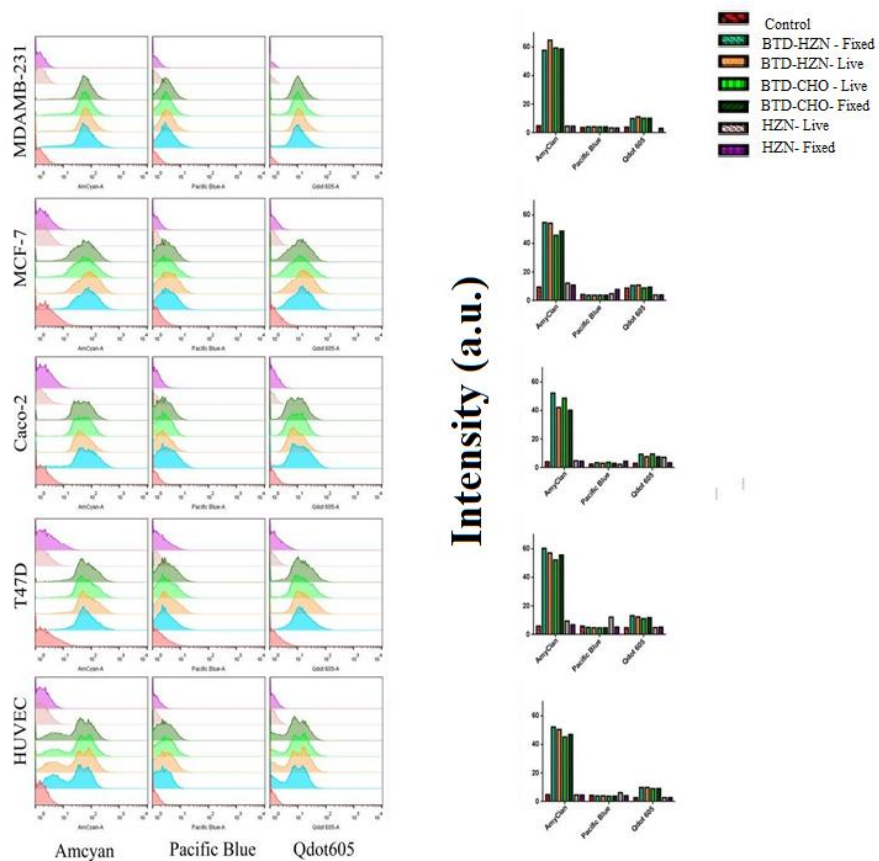

**Figure S19.** Flow cytometry analyses of **BTD-CHO** and **BTD-HZN** to depict the fluorescence intensity of both dyes ( $10 \mu\text{M}$  each) inside the different cells' lineages in comparison with commercial standards. Blue and dark green (live cells), orange and green (fixed cells) and red, purple and pink (controls). Analyses refer to 10 thousand events per channel using the following standards: Amcyan (green channel), Pacific Blue (blue channel) and Qdot605 (red channel).

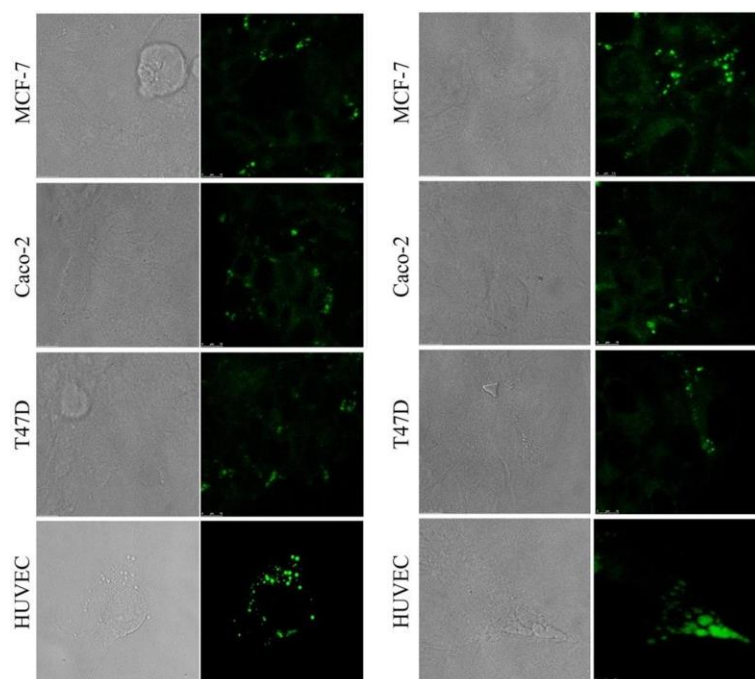

**Figure S20.** Live (left) and fixed (right) cells lineages stained with **BTD-CHO** (10  $\mu$ M) indicating their lipid droplets selectivity. Scale bar of 10  $\mu$ m.

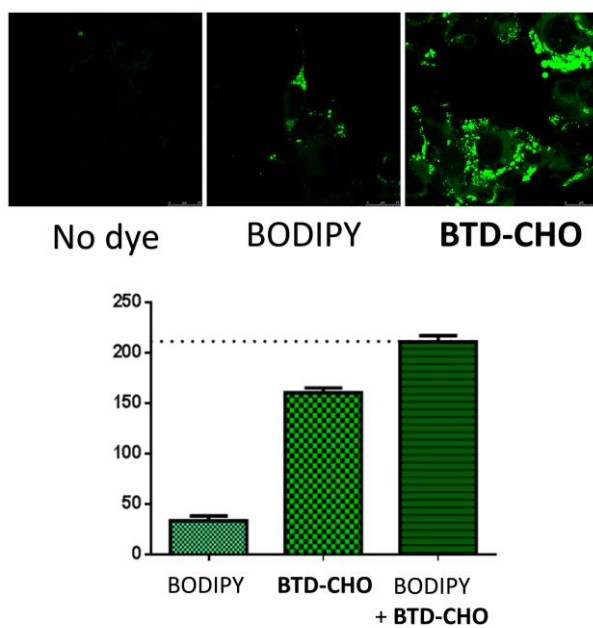

**Figure S21.** Experiments using BODIPY (12  $\mu$ M) and **BTD-CHO** (10  $\mu$ M) showing the relative intensity of the dyes (bottom) and their lipid droplets staining (top). Note the developed dye is far more intense with a lower concentration.

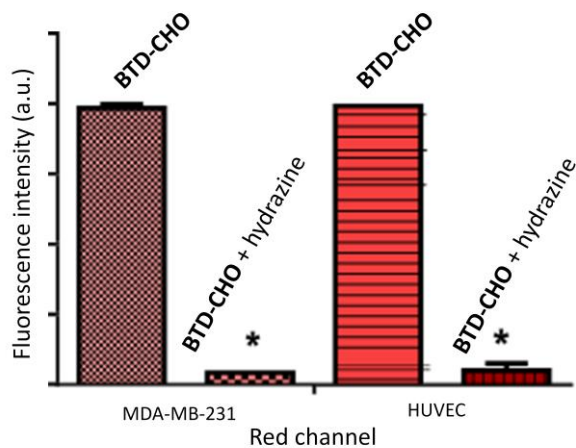

**Figure S22.** Red channel fluorescence intensity before and after hydrazine addition in two different cellular models i.e. MDA-MB-231 and HUVEC cells lineages.

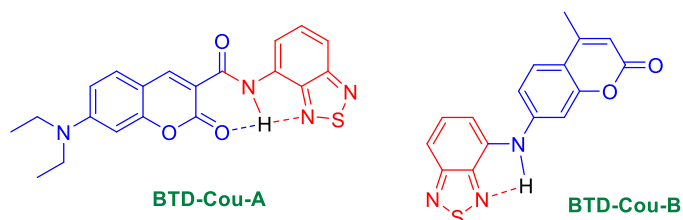

**Figure S23.** Structures of lipophilic fluorescent BTD derivatives previously published<sup>1</sup> also tested in this work for microalgae and for *C. elegans* staining.

**Table S1.** Limit of detection of some available hydrazine selective sensors and of this work.

| Sensor                                        | LOD                         | Reference |
|-----------------------------------------------|-----------------------------|-----------|
| AIE coumarin-based sensor                     | 0.101 $\mu\text{M}$         | 2         |
| Naphthalimide-based probe                     | 0.31 $\mu\text{M}$ (10 ppb) | 3         |
| 4 <i>H</i> -chromene derivative               | 6.1 ppb                     | 4         |
| 1,8-naphthalene imide derivative              | 9.40 nM                     | 5         |
| Phthalimide-based UiO-66 MOF                  | 0.87 $\mu\text{M}$          | 6         |
| Benzimidazole-based probe                     | 1.22 ppb                    | 7         |
| Coumarin-based probe                          | 69 nM                       | 8         |
| Carbon dots derivative                        | 0.504 $\mu\text{M}$         | 9         |
| 2,3-Dihydro-1 <i>H</i> -xanthene-based sensor | 5.4 ppb                     | 10        |
| Benzothiadiazole-based sensor                 | 7.3 ppb                     | This work |

**Table S2.** Comparison of TD-DFT results employing different Exchange-Correlation (XC) functionals associated with the lowest absorption energy. Horizontal red line stands for the experimentally determined  $\lambda_{max}$  in acetonitrile.

| BTD-CHO          |                                              |                                            |                         |
|------------------|----------------------------------------------|--------------------------------------------|-------------------------|
| XC-Functional    | $S_0 \rightarrow S_1$ excitation energy (eV) | $\lambda_{max}$ absorption wavelength (nm) | Oscillator Strength $f$ |
| B3LYP            | 2.69                                         | 461                                        | 0.54                    |
| CAM-B3LYP        | 3.25                                         | 381                                        | 0.75                    |
| LC- $\omega$ PBE | 3.63                                         | 341                                        | 0.90                    |
| M06              | 2.81                                         | 441                                        | 0.60                    |
| M062X            | 3.31                                         | 375                                        | 0.79                    |
| M11              | 3.56                                         | 348                                        | 0.89                    |
| PBE1PBE          | 2.82                                         | 439                                        | 0.59                    |
| $\omega$ B97XD   | 3.30                                         | 375                                        | 0.77                    |
| BTD-HZN          |                                              |                                            |                         |
| XC-Functional    | $S_0 \rightarrow S_1$ excitation energy (eV) | $\lambda_{max}$ absorption wavelength (nm) | Oscillator Strength $f$ |
| B3LYP            | 2.59                                         | 478                                        | 0.52                    |
| CAM-B3LYP        | 3.19                                         | 389                                        | 0.78                    |
| LC- $\omega$ PBE | 3.59                                         | 346                                        | 0.98                    |
| M06              | 2.73                                         | 455                                        | 0.60                    |
| M062X            | 3.24                                         | 382                                        | 0.84                    |
| M11              | 3.51                                         | 353                                        | 1.00                    |
| PBE1PBE          | 2.73                                         | 454                                        | 0.59                    |
| $\omega$ B97XD   | 3.28                                         | 378                                        | 0.82                    |

**Cartesian coordinates of the optimized BTD-CHO and BTD-HZN structures obtained at the CAM-B3LYP/6-311+G(d) level of theory.**

| BTD-CHO ( $S_0$ )                                |                                           |             |                                                     |             |             |
|--------------------------------------------------|-------------------------------------------|-------------|-----------------------------------------------------|-------------|-------------|
| Solvent: Acetonitrile<br>Energy: -1428.414710 Eh | Solvent: Water<br>Energy: -1428.294515 Eh |             | Solvent: Dichloromethane<br>Energy: -1428.291604 Eh |             |             |
| S -0.10509800                                    | 3.18634100                                | 0.01255000  | S -0.10564700                                       | 3.18862100  | 0.01163700  |
| O 7.01933600                                     | -0.43562600                               | -0.25382600 | O 7.01933400                                        | -0.43869700 | -0.25357600 |
| N -1.33454200                                    | 2.12764300                                | 0.02460400  | N -1.33515600                                       | 2.12967700  | 0.02799500  |
| N 1.13870100                                     | 2.14649600                                | -0.01875700 | N 1.13852900                                        | 2.14912400  | -0.02198400 |
| C 2.86121300                                     | -0.32669200                               | -0.07253900 | C 2.86174900                                        | -0.32454900 | -0.07095100 |
| C -3.01410800                                    | -0.38028500                               | 0.04407400  | C -3.01426800                                       | -0.37890900 | 0.04525200  |
| C 5.66665000                                     | -0.45200800                               | -0.14858000 | C 5.66675700                                        | -0.45357000 | -0.14760500 |
| C -0.81003300                                    | 0.90614000                                | 0.00936000  | C -0.81012000                                       | 0.90847600  | 0.01170400  |
| C 3.59994500                                     | 0.54242800                                | -0.88537400 | C 3.60211500                                        | 0.54959900  | -0.87681000 |
| H 3.08685100                                     | 1.27010200                                | -1.50053300 | H 3.09021000                                        | 1.28373300  | -1.48496100 |
| C 0.63338300                                     | 0.91665300                                | -0.02655800 | C 0.63337500                                        | 0.91932000  | -0.02671700 |
| C 1.38386600                                     | -0.30610800                               | -0.05250700 | C 1.38433700                                        | -0.30313600 | -0.05153200 |
| C -1.53647000                                    | -0.32946200                               | 0.01291400  | C -1.53662900                                       | -0.32706600 | 0.01579700  |
| O -7.95716100                                    | -1.40009700                               | -0.44871000 | O -7.95443800                                       | -1.40994700 | -0.44839900 |
| C -3.75233600                                    | 0.46454300                                | 0.87583500  | C -3.75481000                                       | 0.46989800  | 0.87064200  |
| H -3.24284300                                    | 1.18903100                                | 1.49647700  | H -3.24692700                                       | 1.19990000  | 1.48595600  |
| C -3.69731400                                    | -1.31066200                               | -0.75046700 | C -3.69560200                                       | -1.31388800 | -0.74520900 |
| H -3.13883200                                    | -0.95110600                               | -1.41900300 | H -3.13539600                                       | -0.95997000 | -1.41082400 |
| C -5.80499600                                    | -0.55837300                               | 0.12985700  | C -5.80510100                                       | -0.56004600 | 0.12795000  |
| C 4.97807500                                     | 0.47878000                                | -0.92850500 | C 4.97973300                                        | 0.48387400  | -0.92046100 |
| H 5.54459800                                     | 1.14614500                                | -1.56762900 | H 5.54827500                                        | 1.15499000  | -1.55366700 |
| C 3.56401000                                     | -2.41751300                               | 0.70000600  | C 3.56309000                                        | -2.25106800 | 0.69561200  |
| H 3.02391500                                     | -1.91956900                               | 1.35739200  | H 3.02175100                                        | -1.92539700 | 1.34971900  |
| C -0.77928400                                    | -1.46617900                               | -0.01459400 | C -0.77866900                                       | -1.46333500 | -0.01133900 |
| H -1.27266900                                    | -2.43108400                               | 0.00156300  | H -1.27254800                                       | -2.42803300 | 0.00625200  |
| C -5.07489800                                    | -1.40046400                               | -0.70956600 | C -5.07304600                                       | -1.40547100 | -0.70575700 |
| H -5.59832700                                    | -2.11721700                               | -1.33113300 | H -5.59630900                                       | -2.12520900 | -1.32399800 |
| C 4.95225500                                     | -1.31837200                               | 0.67260000  | C 4.95108100                                        | -1.32398500 | 0.66776000  |
| C 5.45548500                                     | -2.04334600                               | 1.29774200  | C 5.45342100                                        | -2.05327000 | 1.28865200  |
| H -7.27351300                                    | -0.63304000                               | 0.19411600  | H -7.27398000                                       | -0.63726500 | 0.18928000  |
| H -7.75083000                                    | 0.07875800                                | 0.89170200  | H -7.75426100                                       | 0.07864900  | 0.88170700  |
| C -5.13362100                                    | 0.37175400                                | 0.92029400  | C -5.13386100                                       | 0.37539300  | 0.91343900  |
| H -5.69655800                                    | 1.02654600                                | 1.57717100  | H -5.70071400                                       | 1.03383600  | 1.56558800  |
| C 0.64352800                                     | -1.45502400                               | -0.04812600 | C 0.64382900                                        | -1.45193000 | -0.04607300 |
| H 1.15210500                                     | -2.41125300                               | -0.08511300 | H 1.15320500                                        | -2.40772000 | -0.08411400 |
| C 7.76934900                                     | -1.37005300                               | 0.50740200  | C 7.76771900                                        | -1.37857600 | 0.50031400  |
| H 8.81259300                                     | -1.18540800                               | 0.26537500  | H 8.81106900                                        | -1.19431600 | 0.25829100  |
| H 7.51061900                                     | -2.39652000                               | 0.23764100  | H 7.50706800                                        | -2.40316500 | 0.22437000  |
| H 7.61436800                                     | -1.22187100                               | 1.57849900  | H 7.61452700                                        | -1.23701800 | 1.57278300  |
| BTD-CHO ( $S_1$ )                                |                                           |             |                                                     |             |             |

| Solvent: Acetonitrile<br>Energy: -1428.260356 Eh | Solvent: Water<br>Energy: -1428.275526Eh  | Solvent: Dichloromethane<br>Energy: -1428.257879Eh  |
|--------------------------------------------------|-------------------------------------------|-----------------------------------------------------|
| C 0.61892900 -1.49799000 -0.11410700             | C 0.64192300 -1.45091100 -0.04681200      | C 0.62047800 -1.49288100 -0.10529600                |
| C -0.76374800 -1.49513900 -0.10980700            | C -0.78014000 -1.46078800 -0.00704200     | C -0.76244500 -1.49151400 -0.10297300               |
| C -1.53749100 -0.31525200 -0.04867400            | C -1.54078600 -0.30242600 -0.01963900     | C -1.53775100 -0.31249700 -0.04547800               |
| C -0.79749000 0.91184500 -0.01013200             | C -0.80736500 -0.99088100 -0.01207800     | C -0.79771000 0.91496200 -0.00794600                |
| C 0.63510200 0.90809400 -0.01109900              | C 0.63714300 0.91870100 -0.02384100       | C 0.635392600 0.91314300 -0.00781600                |
| C 1.36623300 -2.14335900 -0.02060300             | C 1.38583100 -2.30421000 -0.05141400      | C 1.36741500 -2.30635400 -0.03658700                |
| N -1.32178200 2.14335900 -0.02060300             | N -1.32860200 2.13297100 -0.02816500      | N -1.32420400 2.14599100 -0.01935300                |
| S -0.05368600 3.21985300 0.06673500              | S -0.09085000 3.19062800 0.00910400       | S -0.05891600 3.22274500 0.06579800                 |
| N 1.18761700 2.12854800 0.02343200               | N 1.14471900 2.14779800 -0.01832400       | N 1.18467800 2.13428000 0.02439400                  |
| H 1.13810300 -2.44703000 -0.16520200             | H 1.14900800 -2.40820200 -0.08383600      | H 1.13999600 -2.44181900 -0.15585800                |
| H -1.26984700 -2.45174900 -0.11997400            | H -1.27286900 -2.42582500 0.01559300      | H -1.26795000 -2.44845100 -0.11183300               |
| C -2.97958300 -0.37330000 0.00290300             | C -3.01495100 -0.37099200 0.04592800      | C -2.97936900 -0.37200100 0.00266500                |
| C -3.74331200 0.63104600 0.65175900              | C -3.76854300 0.50675900 0.84301400       | C -3.74638400 0.63522400 0.64380000                 |
| C -3.68482300 -0.46136500 -0.57571900            | C -3.70439700 -0.42678200 -0.70509200     | C -3.68200400 -0.46449300 -0.57141500               |
| C -5.11638800 0.54868800 0.70701100              | C -5.14128200 0.34600700 0.89857600       | C -5.11925100 0.55029900 0.69661300                 |
| H -3.23415900 1.45570800 1.12793000              | H -3.26284600 1.25622700 1.43735900       | H -3.23941300 1.46444700 1.11427000                 |
| C -5.05266900 -1.53309300 -0.52531100            | C -5.08244400 -1.42226700 -0.67093500     | C -5.04950800 -1.53864200 -0.52295000               |
| H -3.14026700 -2.23298800 -1.10529400            | H -3.15130700 -2.00294500 -1.34855100     | H -3.13519700 -2.23719600 -1.09722700               |
| C -5.79940700 -0.52571500 0.12180500             | C -5.83051800 -0.54273300 0.13863000      | C -5.79911000 -0.53030700 0.11735400                |
| H -5.67908200 1.32219400 1.22004200              | H -5.69689500 1.10823100 1.53180200       | H -5.68459100 1.32626200 1.20313900                 |
| H -5.57568100 -2.36047700 -0.98960100            | H -5.58958600 -2.16690900 -1.27301700     | H -5.57181800 -2.36851900 -0.98352200               |
| C 2.83022800 -0.33307800 -0.08229000             | C 2.86370500 -0.32812300 -0.07308000      | C 2.83107300 -0.32942500 -0.07617600                |
| C 3.57894000 -0.53532700 -0.90669900             | C 3.60396600 -0.53634000 -0.88906000      | C 3.58114400 0.55389800 -0.88346200                 |
| C 3.53011800 -1.25773300 0.71571600              | C 3.56616300 -1.24766900 0.70129800       | C 3.53074900 -1.26971200 0.70341400                 |
| C 4.944725500 0.47091100 -0.93478300             | C 4.98219100 0.47100200 -0.93282200       | C 4.94941600 0.48764000 -0.91392900                 |
| H 3.06242700 1.25326700 -1.52823700              | H 3.09164400 1.26346000 -1.50614000       | H 3.06534800 1.28582200 -1.48878700                 |
| C 4.90591800 -1.33332200 0.69615500              | C 4.95448100 -1.32168400 0.67254800       | C 4.90660600 -1.34673000 0.68160700                 |
| H 2.97764900 -1.91982200 1.37125100              | H 3.02545800 -1.91709900 1.36088300       | H 2.97817600 -1.94209400 1.34855100                 |
| C 5.63046700 -0.46463800 -0.13424800             | C 5.66982700 -0.45878000 -0.15105100      | C 5.63184200 -0.46498800 -0.13278800                |
| H 5.52767700 1.12902000 -1.56950400              | H 5.54929800 1.13574900 -1.57424400       | H 5.53060200 1.15735500 -1.52567200                 |
| H 5.40975800 -2.05516700 1.32338900              | H 5.45679900 -2.04626300 1.29893500       | H 5.40991100 -2.08019200 1.29577500                 |
| O 6.96112000 -0.45077500 -0.23069600             | O 7.02316000 -0.44483200 -0.25713100      | O 6.96306500 -0.45109700 -0.23105200                |
| C 7.73602600 -1.37095600 0.53745200              | C 7.77143800 -1.37815200 0.50725600       | C 7.73611800 -1.38792200 0.51641900                 |
| H 7.48593500 -2.39095000 0.27264500              | H 7.51105800 -2.40501500 0.24070400       | H 7.48239500 -2.41029500 0.23241200                 |
| H 8.77104600 -1.16711300 0.28167600              | H 8.81506600 -1.19602000 0.26501100       | H 8.77139800 -1.18282900 0.26235500                 |
| H 7.58101900 -1.20811200 1.60460700              | H 7.61628400 -1.22645000 1.57782100       | H 7.58491900 -1.24601200 1.58733700                 |
| C -7.25154200 -0.58963300 0.19359500             | C -7.25219100 -0.62247500 0.18986800      | C -7.25186300 -0.59755000 0.18668900                |
| H -7.73418500 -2.47734000 0.72851100             | H -7.84078800 0.06179200 0.81788100       | H -7.73835800 0.24315300 0.71389800                 |
| O -7.94097400 -1.47918400 -0.28703800            | O -7.95664200 -1.46734100 -0.46786100     | O -7.93634500 -1.49294000 -0.28738200               |
| <b>BTD-HZN (S<sub>0</sub>)</b>                   |                                           |                                                     |
| Solvent: Acetonitrile<br>Energy: -1463.848083 Eh | Solvent: Water<br>Energy: -1463.730077Eh  | Solvent: Dichloromethane<br>Energy: -1463.726842 Eh |
| C 0.61892900 -1.49799000 -0.11410700             | C 1.01287300 -1.42277500 -0.02651100      | C 1.01090200 -1.41769100 -0.02633200                |
| C -0.76374800 -1.49513900 -0.10980700            | C -0.40964300 -1.39126400 0.01790800      | C -0.41139400 -1.38438500 0.01841200                |
| C -1.53749100 -0.31525200 -0.04867400            | C -1.13438100 -0.23303800 0.03776600      | C -1.13573600 -0.22581900 0.03746000                |
| C -0.79749000 0.91184500 -0.01013200             | C -0.36901200 0.97938100 0.01595900       | C -0.36834400 0.98577700 0.01671400                 |
| C 0.63510200 0.90809400 -0.01109900              | C 1.07436400 0.94695800 -0.02713600       | C 1.07546600 0.95149200 -0.02756400                 |
| C 1.36623300 -2.14335900 -0.07318100             | C 1.78764300 -2.29277800 -0.04632600      | C 1.78771400 -2.29362700 -0.04610200                |
| N -1.32178200 2.14335900 -0.02060300             | N -0.85637900 -0.12658100 0.02128400      | N -0.85398100 2.22333800 0.02376700                 |
| S -0.05368600 3.21985300 0.06673500              | S 0.40380100 3.23802000 -0.00802300       | S 0.40785700 3.24037800 -0.00699300                 |
| N 1.18761700 2.12854800 0.02343200               | N 1.61664200 2.16114300 -0.03478000       | N 1.61945600 2.16455400 -0.03644600                 |
| H 1.13810300 -2.44703000 -0.16520200             | H 1.49275100 -2.39414400 -0.05680300      | H 1.48980500 -2.38955100 -0.05803200                |
| H -1.26984700 -2.45174900 -0.11997400            | H -0.93143000 -2.34086100 0.04768800      | H -0.93437500 -2.33330000 0.04943300                |
| C -2.97958300 -0.37330000 0.00290300             | C -2.61271900 -0.23778800 0.07399100      | C -2.61402500 -0.23066500 0.07123800                |
| C -3.74331200 0.63104600 0.65175900              | C -3.32863700 0.63099700 0.89796600       | C -3.33272000 0.64901300 0.88097200                 |
| C -3.68482300 -0.46136500 -0.57571900            | C -3.33302300 -1.15052900 -0.70557200     | C -3.33214700 -1.15476500 -0.69706500               |
| C -5.11638800 0.54868800 0.70701100              | C -4.71325300 0.57848800 0.94851100       | C -4.71711200 0.59463200 0.93039500                 |
| H -3.23415900 1.45570800 1.12793000              | H -2.80066200 1.34754900 1.51336600       | H -2.80681100 1.37686000 1.48448800                 |
| C -5.05266900 -1.53309300 -0.52531100            | C -4.71393200 -1.19909300 -0.65973600     | C -4.71266100 -1.20595400 -0.65203200               |
| H -3.14026700 -2.23298800 -1.10529400            | H -2.80135500 -1.80165000 -1.37217100     | H -2.79860000 -1.83058800 -1.35592300               |
| C -5.79940700 -0.52571500 0.12180500             | C -5.42823400 -0.33831200 0.17300000      | C -5.42926900 -0.33092300 0.16826800                |
| H -5.67908200 1.32219400 1.22004200              | H -5.24699900 1.25863600 1.60475000       | H -5.25325700 1.28373400 1.57507100                 |
| H -5.57568100 -2.36047700 -0.98960100            | H -5.25127700 -1.90729900 -1.27852800     | H -5.24960700 -1.92218300 -1.26181900               |
| C 2.83022800 -0.33307800 -0.08229000             | C 3.26418600 -0.30775600 -0.07533400      | C 3.26398500 -0.36076800 0.07405500                 |
| C 3.57894000 0.53532700 -0.90669900              | C 4.02224700 0.47287100 -0.90624200       | C 4.02535200 0.47911700 -0.89665700                 |
| C 3.53011800 -1.25773300 0.71571600              | C 3.94581900 -1.28976800 0.70726800       | C 3.94248300 -1.29620300 0.70213800                 |
| C 4.944725500 0.47091100 -0.93478300             | C 5.39798300 0.37013100 -0.95607000       | C 5.40043100 0.37276600 -0.94617600                 |
| H 3.06242700 1.25326700 -1.52823700              | H 3.52584400 1.20476100 -1.53011900       | H 3.53147800 1.21884300 -1.51303300                 |
| C 4.90591800 -1.33332200 0.69615500              | C 5.33159400 -1.40035200 0.67289700       | C 5.32786100 -1.41042800 0.66809100                 |
| H 2.97764900 -1.91982200 1.37125100              | H 3.39096800 0.93640500 1.37776100        | H 3.38520500 -1.94511400 1.36849300                 |
| C 5.63046700 -0.46463800 -0.13424800             | C 6.06490000 -0.56704300 -0.16527600      | C 6.06412900 -0.57286000 -0.16298500                |
| H 5.52767700 1.12902000 -1.56950400              | H 5.97873400 1.01144100 -1.60898900       | H 5.98473800 1.01789600 -1.59203200                 |
| H 5.40975800 -2.05516700 1.32338900              | H 5.81791400 -2.12975800 1.30621800       | H 5.81197000 -2.14533300 1.29685300                 |
| O 6.96112000 -0.45077500 -0.23069600             | C -6.89248700 -0.35230100 0.25679900      | C -6.89338500 -0.35339400 0.25075200                |
| C 7.73602600 -1.37095600 0.53745200              | O -7.35914300 0.38461300 0.91924000       | O -7.36382200 0.39559600 0.89741000                 |
| H 7.48593500 -2.39095000 0.27264500              | H 7.41758500 -0.58967600 -0.27782500      | H 7.41663500 -0.59836000 -0.27524000                |
| H 8.77104600 -1.16711300 0.28167600              | C 8.14571100 -1.25998500 0.49752500       | C 8.14147700 -1.54473900 0.49307000                 |
| H 7.58101900 -1.20811200 1.60460700              | H 7.85894500 -1.53588700 0.24727800       | H 7.85228300 -1.56672600 0.23659700                 |
| C -7.25154200 -0.58963300 0.19359500             | H 9.19250100 -1.37739700 0.24856200       | H 9.18881600 -1.39372600 0.24511500                 |
| H -7.73418500 -2.47734000 0.72851100             | H 7.99888400 -1.35855200 1.56627300       | H 7.99577000 -1.38019700 1.56334200                 |
| O -7.94097400 -1.47918400 -0.28703800            | N -7.60164400 -1.17648200 -0.40289200     | N -7.59843700 -1.19359300 -0.39226700               |
|                                                  | N -8.96388800 -1.07585200 -0.31049300     | N -8.96048300 -1.09723500 -0.30312100               |
|                                                  | H -9.39749200 -1.96925200 -0.49143900     | H -9.39078500 -1.99406000 -0.47341100               |
|                                                  | H -9.30482900 -0.67004900 0.55755900      | H -9.30553300 -0.67740400 0.55647400                |
| <b>BTD-HZN (S<sub>1</sub>)</b>                   |                                           |                                                     |
| Solvent: Acetonitrile<br>Energy: -1463.749434 Eh | Solvent: Water<br>Energy: -1463.750069 Eh | Solvent: Dichloromethane<br>Energy: -1463.746255 Eh |
| C 0.97618600 -1.37712000 0.00988000              | C 0.97630600 -1.37691100 0.01177800       | C 0.97565800 -1.37820300 0.00946600                 |
| C 0.38601300 -1.34337000 -0.00364700             | C -0.38575700 -1.34328400 -0.00177400     | C -0.38722200 -1.34394500 -0.01282000               |
| C -1.14654400 -0.13181300 0.00687200             | C -1.14670500 -0.13174500 0.00802100      | C -1.14561400 -0.13225800 0.00141600                |
| C -0.37140000 1.08403000 0.01235900              | C -0.37152800 1.08053200 0.01279400       | C -0.37078700 1.07967200 0.01028700                 |
| C 1.08694500 1.040173700 -0.00652200             | C 1.08703200 1.04199900 -0.00583000       | C 1.08641700 1.04046400 -0.01043800                 |
| C 1.79656300 -0.20573000 -0.00289000             | C 1.79659500 -0.20545100 -0.00178700      | C 1.79456900 -0.20707400 -0.00856200                |
| N -0.85828400 2.31184900 0.01210500              | N -0.85833100 2.31193600 0.01143100       | N -0.85824400 2.31129500 0.01502800                 |
| S 0.19603000 3.27296900 0.00539500               | S 0.41932000 3.37330300 0.00466300        | S 0.42072900 3.37131400 0.00791300                  |
| N 1.63985100 2.34708100 -0.00264200              | N 1.63957600 2.24740600 -0.00227600       | N 1.64104000 2.24555800 -0.00557000                 |
| H 1.44779500 -2.34924700 -0.00584000             | H 1.44779100 -2.34908500 -0.00315400      | H 1.44795100 -2.35004500 -0.01909000                |
| H -0.90471500 -2.29083500 0.01262800             | H -0.90422600 -2.29086100 0.01506300      | H -0.90712700 -2.29081300 0.00904700                |
| C -2.58330100 -0.17320300 0.01901900             | C -2.58329100 -0.17330400 0.02014400      | C -2.58328000 -0.17286600 0.01410600                |
| C -3.38250500 0.94104100 0.37781400              | C -3.38296400 0.94099900 0.37814200       | C -3.38001000 0.94050400 0.37878600                 |
| C -3.28229900 -1.36563100 -0.32188100            | C -3.28207900 -1.36614700 -0.32008400     | C -3.28330100 -1.36274500 -0.33164800               |
| C -4.75698600 0.85755400 0.40856800              | C -4.75745000 0.85739600 0.40838000       | C -4.75447700 0.85751800 0.41233100                 |
| H -2.90132300 1.86800600 0.64490500              | H -2.90221400 1.86812800 0.64545100       | H -2.89660700 1.86620700 0.64626000                 |
| C -4.65143000 -1.43569600 -0.30526300            | C -4.65122700 -1.43628600 -0.30403000     | C -4.65237100 -1.43246500 -0.31213600               |
| H -2.73656500 -2.24234900 -0.64194700            | H -2.73619600 -2.24314600 -0.63909400     | H -2.73827000 -2.23754900 -0.65827000               |
| C -5.42729300 -0.32417700 0.06766800             | C -5.42751800 -0.32459800 0.06769700      | C -5.42599100 -0.32233800 0.06852200                |
| H -5.33291600 1.72824500 0.70497400              | H -5.33362100 1.72807400 0.70432300       | H -5.32914600 1.72773900 0.71271000                 |
| H -5.14790400 -2.35512400 -0.58951600            | H -5.14720300 -2.35614500 -0.5877         |                                                     |

|   |             |             |             |   |             |             |             |   |             |             |              |
|---|-------------|-------------|-------------|---|-------------|-------------|-------------|---|-------------|-------------|--------------|
| C | 3.86840000  | -1.53398900 | 0.34009700  | C | 3.86871000  | -1.53415300 | 0.33958800  | C | 3.86678300  | -1.53318600 | 0.34234600   |
| C | 5.44895800  | 0.59854300  | -0.44300300 | C | 5.44921200  | 0.59896400  | -0.44235100 | C | 5.44773400  | 0.59658300  | -0.444581300 |
| H | 3.64926600  | 1.68976200  | -0.69106300 | H | 3.64973900  | 1.69037800  | -0.68983900 | H | 3.64700000  | 1.68688000  | -0.69685800  |
| C | 5.23780100  | -1.68388400 | 0.32155100  | C | 5.23802300  | -1.68412200 | 0.32055400  | C | 5.23660400  | -1.68274200 | 0.32634400   |
| H | 3.28244500  | -2.37681300 | 0.67958500  | H | 3.28294300  | -2.37734300 | 0.67841900  | H | 3.27985000  | -2.37427000 | 0.68480100   |
| C | 6.04752100  | -0.61497400 | -0.07808200 | C | 6.04780900  | -0.61492900 | -0.07842900 | C | 6.04605900  | -0.61515400 | -0.07614900  |
| H | 6.08631200  | 1.41688400  | -0.75686900 | H | 6.08646300  | 1.41746500  | -0.75603600 | H | 6.08566500  | 1.41416500  | -0.76036600  |
| H | 5.66887100  | -2.62809800 | 0.62460100  | H | 5.66902600  | -2.62864900 | 0.62265100  | H | 5.66788300  | -2.62515100 | 0.63388000   |
| C | -6.87860700 | -0.36224200 | 0.10780800  | C | -6.87887500 | -0.36246400 | 0.10691900  | C | -6.87714800 | -0.36133200 | 0.11309300   |
| H | -7.39722600 | 0.55868300  | 0.39155100  | H | -7.39751100 | 0.55848800  | 0.39027700  | H | -7.39551700 | 0.55902800  | 0.40039200   |
| O | 7.38708400  | -0.65846000 | -0.13923600 | O | 7.38721200  | -0.65848100 | -0.13999400 | O | 7.38641800  | -0.65825000 | -0.13517000  |
| C | 8.06129300  | -1.86233100 | 0.21543600  | C | 8.06164400  | -1.86298600 | 0.21314100  | C | 8.05961300  | -1.85888000 | 0.22709100   |
| H | 7.76255400  | -2.68294000 | -0.43896400 | H | 7.76225600  | -2.68281500 | -0.44185200 | H | 7.76382100  | -2.68352300 | -0.42400600  |
| H | 9.11970200  | -1.65797500 | 0.08343700  | H | 9.11994700  | -1.65855100 | 0.08055700  | H | 9.11849100  | -1.65493700 | 0.09746900   |
| H | 7.86655500  | -2.12495100 | 1.25659800  | H | 7.86753200  | -2.12643400 | 1.25415900  | H | 7.86224500  | -2.11712400 | 1.26911400   |
| N | -7.53633800 | -1.42195000 | -0.17663600 | N | -7.53656500 | -1.42214000 | -0.17796900 | N | -7.53517400 | -1.42053000 | -0.17124900  |
| N | -8.88793100 | -1.35694100 | -0.17638400 | N | -8.88826800 | -1.35678100 | -0.17890000 | N | -8.88627300 | -1.35708100 | -0.16534800  |
| H | -9.30976100 | -2.26217800 | -0.03555900 | H | -9.31028600 | -2.26181300 | -0.03704600 | H | -9.30719400 | -2.26352000 | -0.03105600  |
| H | -9.30625600 | -0.63016900 | 0.39794300  | H | -9.30663600 | -0.62967600 | 0.39500600  | H | -9.30435900 | -0.63298900 | 0.41237700   |

## References

- (1) Passos, S. T. A.; Souza, G. C.; Brandao, D. C.; Machado, D. F. S.; Grisolia, C. K.; Correa, J. R.; da Silva, W. A.; Neto, B. A. D. Plasma membrane staining with fluorescent hybrid benzothiadiazole and coumarin derivatives: Tuning the cellular selection by molecular design. *Dyes Pigment.* **2021**, *186*, 109005.
- (2) Kong, X.; Li, M.; Zhang, Y.; Yin, Y.; Lin, W. Engineering an AIE N2H4 fluorescent probe based on alpha-cyanostilbene derivative with large Stokes shift and its versatile applications in solution, solid-state and biological systems. *Sens. Actuator B-Chem.* **2021**, *329*, 129232.
- (3) Hao, Y. Q.; Zhang, Y. T.; Ruan, K. H.; Chen, W. S.; Zhou, B. B.; Tan, X. J.; Wang, Y.; Zhao, L. Q.; Zhang, G.; Qu, P.; Xu, M. T. A naphthalimide-based chemodosimetric probe for ratiometric detection of hydrazine. *Sens. Actuator B-Chem.* **2017**, *244*, 417-424.
- (4) Yang, X. P.; Liu, Y. X.; Wu, Y. Y.; Ren, X. L.; Zhang, D.; Ye, Y. A NIR ratiometric probe for hydrazine "naked eye" detection and its imaging in living cell. *Sens. Actuator B-Chem.* **2017**, *253*, 488-494.
- (5) Xia, X. T.; Zeng, F.; Zhang, P. S.; Lyu, J.; Huang, Y.; Wu, S. Z. An ICT-based ratiometric fluorescent probe for hydrazine detection and its application in living cells and in vivo. *Sens. Actuator B-Chem.* **2016**, *227*, 411-418.
- (6) Mostakim, S. K.; Khan, M.; Das, A.; Nandi, S.; Trivedi, V.; Biswas, S. A phthalimide-functionalized UiO-66 metal-organic framework for the fluorogenic detection of hydrazine in live cells. *Dalton Trans.* **2019**, *48*, 12615-12621.
- (7) Teng, M. G.; Zhou, Z. X.; Qin, Y. M.; Zhao, Y. L.; Zhao, C. S.; Cao, J. X. A water-soluble fluorescence sensor with high specificity for detecting hydrazine in river water detection and A549 cell imaging. *Sens. Actuator B-Chem.* **2020**, *311*, 127914.
- (8) Yan, H.; Huo, F.; Yue, Y.; Chao, J.; Yin, C. A practical pH-compatible fluorescent sensor for hydrazine in soil, water and living cells. *Analyst* **2020**, *145*, 7380-7387.
- (9) Liu, W.; Jia, H.; Zhang, J.; Shao, L.; Wang, J.; Fang, D. A novel dual-excitation and dual-emission fluorescent probe CDs-COO-F for hydrazine detection in aqueous solutions and living cells. *Dyes Pigment.* **2021**, *184*, 108831.
- (10) Zhang, J. J.; Ning, L. L.; Liu, J. T.; Wang, J. X.; Yu, B. F.; Liu, X. Y.; Yao, X. J.; Zhang, Z. P.; Zhang, H. X. Naked-Eye and Near-Infrared Fluorescence Probe for Hydrazine and Its Applications in In Vitro and In Vivo Bioimaging. *Anal. Chem.* **2015**, *87*, 9101-9107.
